# Supplementary material for: Effective Categorization of Tolerance to Salt Stress through Clustering Prunus Rootstocks According to Their Physiological Performances
Source: MDPI journal article supplement (doi:10.3390/horticulturae7120542), 2021-12-02
Supplement: s1 [file s1]

|               | 0d            |              | 10d           |               | 20d           |               | 30d           |               |
|---------------|---------------|--------------|---------------|---------------|---------------|---------------|---------------|---------------|
|               | control       | salt         | control       | salt          | control       | salt          | control       | salt          |
| Mariana 2624  | 316.00 ±0.33  | 301.00 ±1.76 | 303.33 ±9.18  | 281.00 ±4.91  | 314.67 ±5.09  | 276.67 ±5.72  | 292.67 ±8.83  | 250.67 ±7.56  |
| Cab 6P        | 308.67 ±1.58  | 303.33 ±2.50 | 276.67 ±8.15  | 275.33 ±17.82 | 300.67 ±4.02  | 274.33 ±15.90 | 303.00 ±10.12 | 259.00 ±8.50  |
| Agaf 0204-09  | 280.67 ±6.06  | 280.67 ±5.83 | 285.00 ±4.81  | 225.67 ±16.85 | 280.00 ±3.79  | 187.67 ±7.28  | 239.33 ±4.88  | 176.33 ±27.78 |
| Maxma60       | 295.33 ±4.14  | 297.00 ±2.03 | 273.67 ±20.22 | 247.00 ±4.48  | 312.67 ±10.12 | 288.00 ±3.46  | 301.67 ±10.01 | 244.00 ±9.00  |
| Garnem        | 291.33 ±8.77  | 285.33 ±6.52 | 253.00 ±3.48  | 336.00 ±17.34 | 283.67 ±21.64 | 309.67 ±6.05  | 310.67 ±2.83  | 258.67 ±13.50 |
| Colt          | 284.67 ±17.32 | 285.33 ±6.62 | 262.67 ±18.51 | 268.33 ±19.59 | 306.00 ±1.20  | 299.67 ±7.18  | 326.00 ±2.08  | 201.33 ±16.52 |
| Mazzard F12/1 | 281.00 ±7.88  | 282.67 ±3.79 | 291.33 ±12.23 | 295.67 ±14.69 | 302.00 ±7.51  | 315.33 ±4.53  | 295.00 ±7.97  | 287.00 ±4.10  |

Supplementary Table S1. Internal CO<sub>2</sub> concentration (*C<sub>i</sub>*) of *Prunus* rootstocks under control and 120 mM NaCl salt stress treatments. The values the mean and standard error of four biological replicates with three technical replicates.

|               | 0d              |                 | 10d             |                 | 20d             |                 | 30d             |                 |
|---------------|-----------------|-----------------|-----------------|-----------------|-----------------|-----------------|-----------------|-----------------|
|               | control         | salt            | control         | salt            | control         | salt            | control         | salt            |
| Mariana 2624  | 3.80 $\pm$ 0.10 | 3.67 $\pm$ 0.15 | 3.77 $\pm$ 0.10 | 2.57 $\pm$ 0.20 | 3.57 $\pm$ 0.34 | 3.33 $\pm$ 0.20 | 2.57 $\pm$ 0.17 | 1.23 $\pm$ 0.05 |
| Cab 6P        | 2.90 $\pm$ 0.09 | 2.97 $\pm$ 0.08 | 3.07 $\pm$ 0.05 | 1.73 $\pm$ 0.08 | 3.90 $\pm$ 0.24 | 2.07 $\pm$ 0.04 | 3.10 $\pm$ 0.12 | 0.63 $\pm$ 0.11 |
| Agaf 0204-09  | 3.07 $\pm$ 0.07 | 3.23 $\pm$ 0.08 | 3.27 $\pm$ 0.07 | 1.20 $\pm$ 0.09 | 3.20 $\pm$ 0.09 | 1.97 $\pm$ 0.25 | 2.77 $\pm$ 0.45 | 0.43 $\pm$ 0.04 |
| Maxma60       | 4.00 $\pm$ 0.09 | 4.03 $\pm$ 0.05 | 3.20 $\pm$ 0.29 | 1.80 $\pm$ 0.13 | 4.17 $\pm$ 0.16 | 2.63 $\pm$ 0.08 | 3.07 $\pm$ 0.14 | 0.70 $\pm$ 0.09 |
| Garnem        | 2.37 $\pm$ 0.13 | 2.63 $\pm$ 0.15 | 2.47 $\pm$ 0.13 | 1.90 $\pm$ 0.09 | 2.37 $\pm$ 0.13 | 1.50 $\pm$ 0.18 | 2.53 $\pm$ 0.02 | 0.97 $\pm$ 0.18 |
| Colt          | 2.70 $\pm$ 0.07 | 2.87 $\pm$ 0.05 | 2.10 $\pm$ 0.15 | 1.33 $\pm$ 0.13 | 3.03 $\pm$ 0.17 | 1.67 $\pm$ 0.16 | 1.47 $\pm$ 0.08 | 0.47 $\pm$ 0.07 |
| Mazzard F12/1 | 3.13 $\pm$ 0.17 | 3.23 $\pm$ 0.14 | 3.70 $\pm$ 0.28 | 1.50 $\pm$ 0.19 | 4.57 $\pm$ 0.30 | 1.43 $\pm$ 0.16 | 3.00 $\pm$ 0.03 | 0.93 $\pm$ 0.19 |

Supplementary Table S2. Transpiration ( $E$ ) of *Prunus* rootstocks under control and 120 mM NaCl salt stress treatments. The values the mean and standard error of four biological replicates with three technical replicates.
